# Supplementary material
Source: PubMed Central journal article supplement (PMC2615650)
Supplement: blood-2008-08-172924_1.pdf [file blood-2008-08-172924_1.pdf]

| PDB  | Protein                                                              | Calcium | Species     | Topology | Feasibility of model |
|------|----------------------------------------------------------------------|---------|-------------|----------|----------------------|
| 2CHD | C2a rabphilin-3a                                                     | Free    | rat         | Type I   | Successful           |
| 2CM5 | C2b rabphilin-3a                                                     | Bound   | rat         | Type I   | Successful           |
| 2CM6 | Rabphilin 3a C2b                                                     | Bound   | rat         | Type I   | Successful           |
| 1A25 | PKC beta                                                             | Bound   | rat         | Type I   | Successful           |
| 3RPB | C2b Rabphilin                                                        | Bound   | rat         | Type I   | Successful           |
| 1DSY | PKC alpha                                                            | Bound   | rat         | Type I   | Successful           |
| 1DQV | Synaptotagmin III C2aC2b                                             | Bound   | rat         | Type I   | Successful           |
| 1WFJ | C2 Domain-Containing Protein From Putative Elicitor-Responsive Gene. | Free    | arabidopsis | Type II  | Successful           |
| 2NQ3 | Hum Itchy homolog E3 ub prot lig                                     | Free    | human       | Type II  | Successful           |
| 1BCI | Phospholipase A2                                                     | Bound   | Human       | Type II  | Successful           |
| 1CJY | Phospholipase A2                                                     | Bound   | Human       | Type II  | Unsuccessful         |
| 1DJG | Phospholipase C delta1                                               | Bound   | Rat         | Type II  | Unsuccessful         |
